# Supplementary material
Source: PubMed Central journal article supplement (PMC5243177)
Supplement: NIHMS805891-supplement-Appendix.pdf [file NIHMS805891-supplement-Appendix.pdf]

Appendix Figure 1. Monthly retail sales of atorvastatin, 2007-2013.

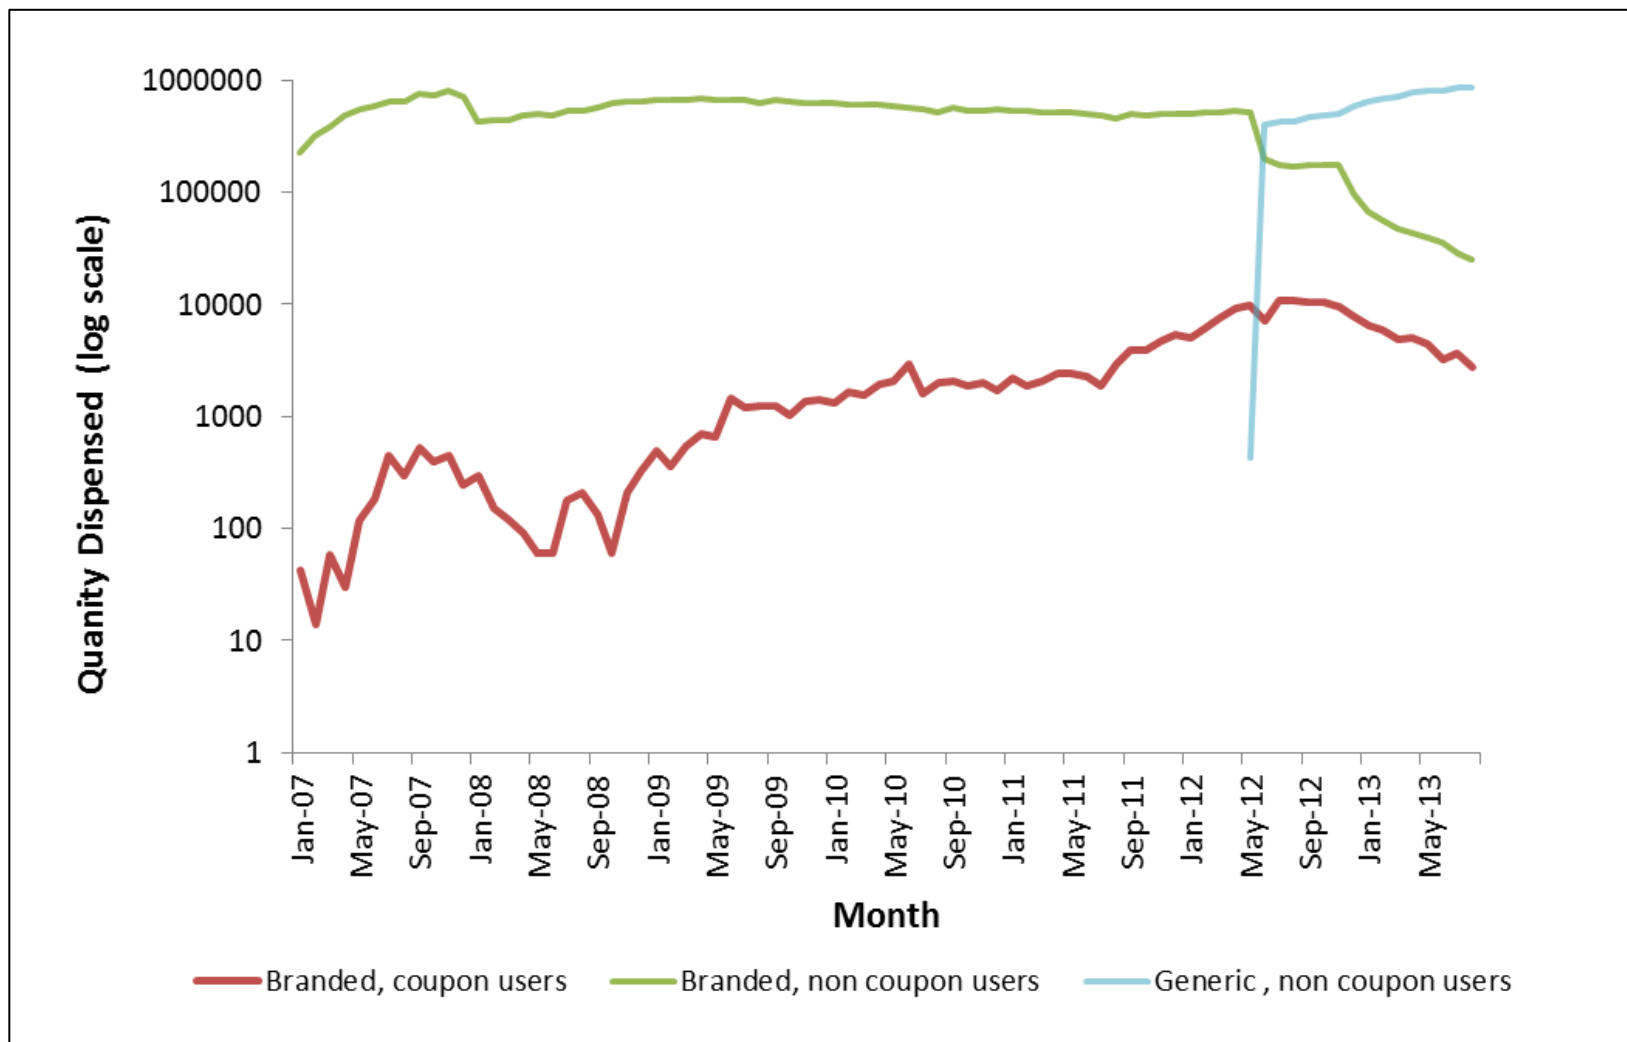

Source: IMS Health Lifelink LRx Data, 2007-2013

Appendix Figure 2. Pharmacy sales of rosuvastatin, 2007-2013.

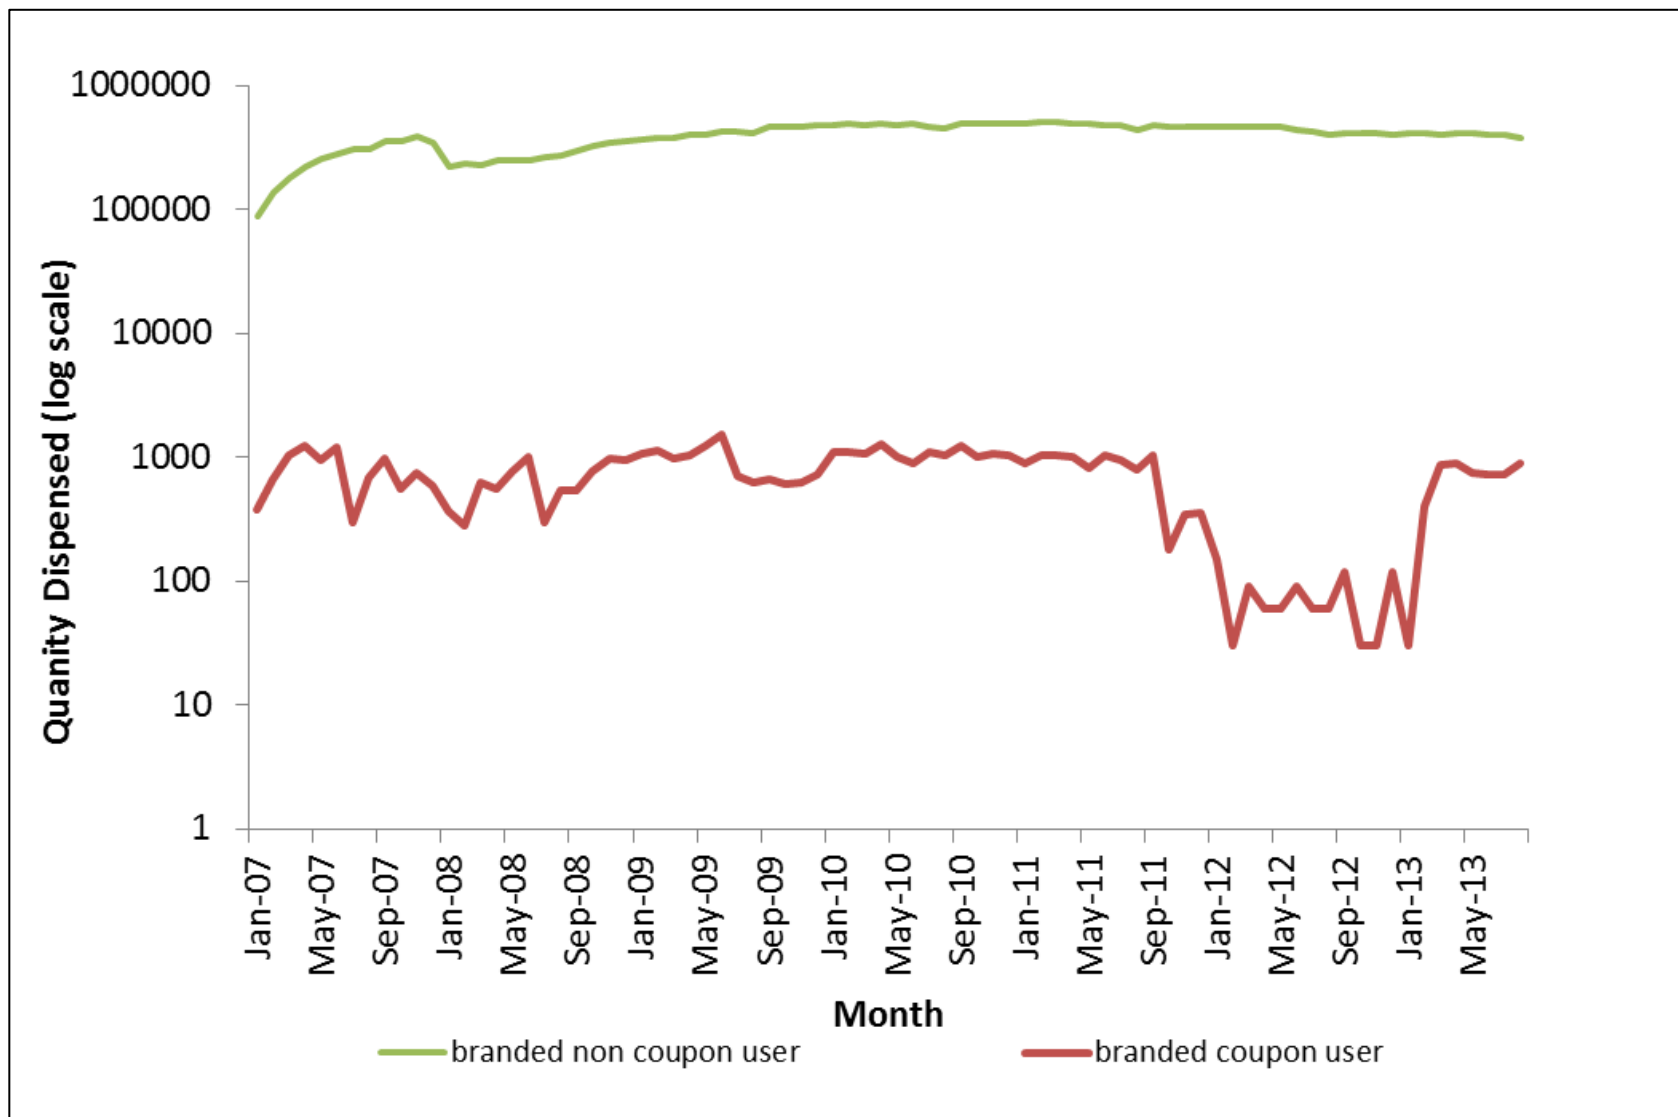

Source: IMS Health Lifelink LRx Data, 2007-2013

**Figure 3. Cumulative termination of atorvastatin and rosuvastatin therapy stratified by coupon use.\***

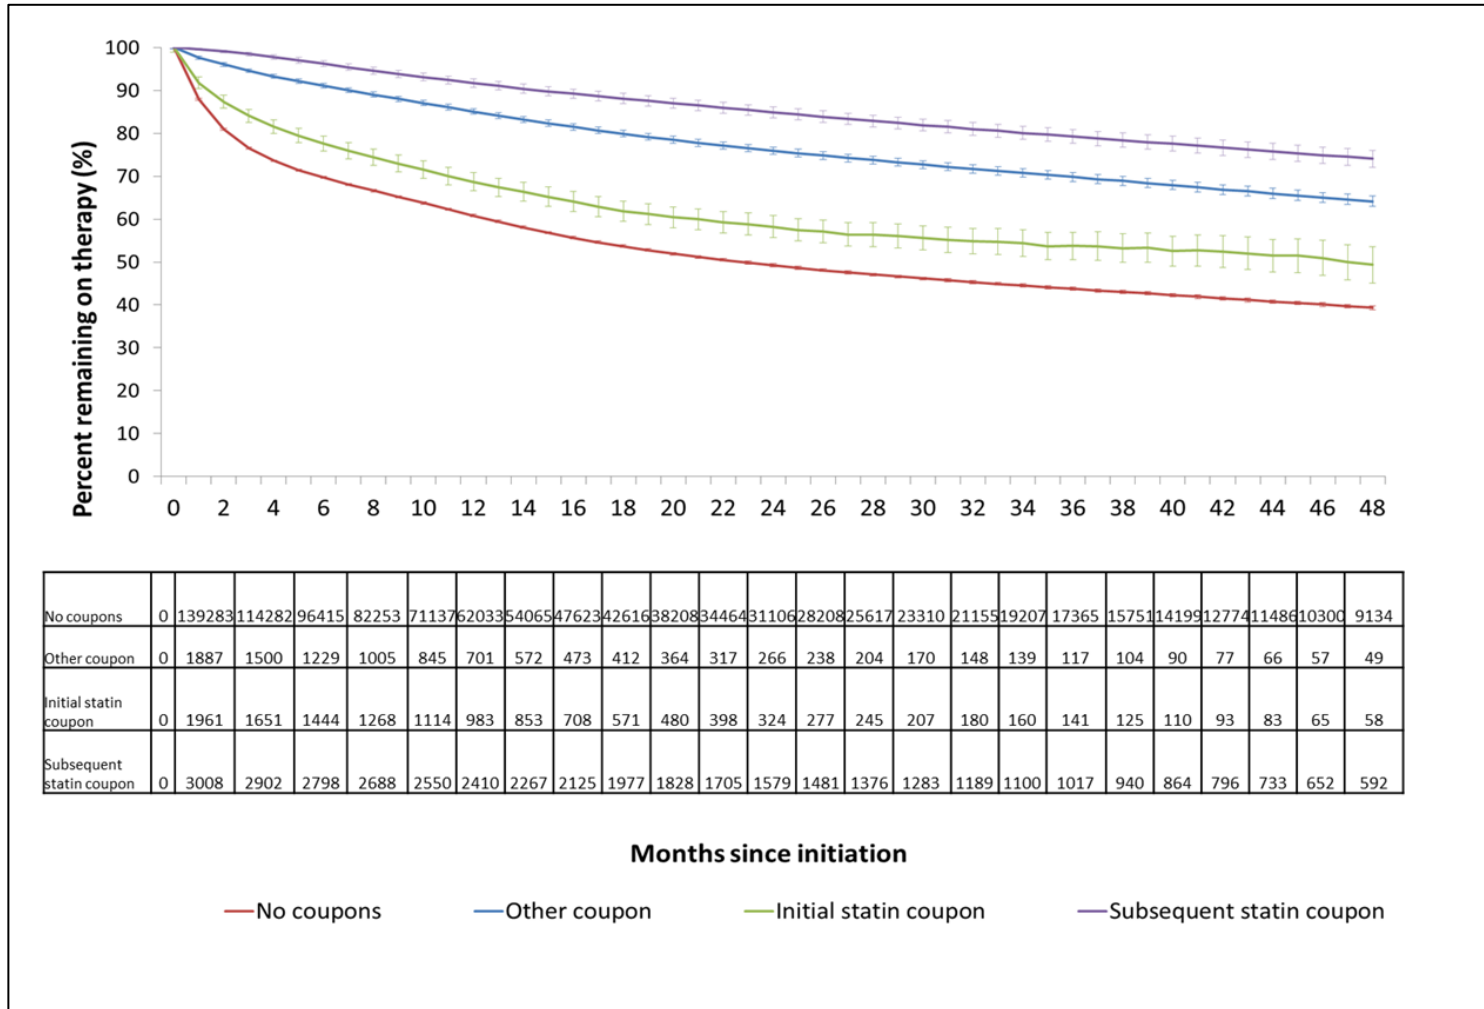

\*Values derived from constant store cohort and reflect probability of termination based on gap in coverage of at least 60 days; values adjusted for patient age, sex and date of incident statin use

Source: IMS Health Lifelink LRx Data, 2007-2013

**Appendix Table 1. Differences in average monthly utilization stratified by type of statin.**

| Time following incident statin fill               | Time following first coupon |             |              |              |              |
|---------------------------------------------------|-----------------------------|-------------|--------------|--------------|--------------|
|                                                   | 1 month                     | 1 year      | 2 years      | 3 years      | 4 years      |
| <b>Atorvastatin (Average pill-days dispensed)</b> |                             |             |              |              |              |
| No coupons                                        |                             |             |              |              |              |
| Predicted level (SE)                              | 29.4 (0.0)                  | 23.8 (0.0)  | 24.7 (0.0)   | 24.8 (-0.1)  | 25.5 (-0.1)  |
| Other coupon                                      |                             |             |              |              |              |
| Predicted level (SE)                              | 28.8 (-0.1)                 | 23.8 (-1.8) | 24.9 (-4.0)  | 25.1 (-6.2)  | 25.3 (-8.5)  |
| Difference from counterfactual*                   | -0.6 (-0.1)                 | 0.0 (-1.8)  | 0.2 (-4.0)   | 0.3 (-6.2)   | -0.2 (-8.5)  |
| Initial statin coupon                             |                             |             |              |              |              |
| Predicted level (SE)                              | 30.3 (-0.3)                 | 24.5 (-3.8) | 24.3 (-8.1)  | 25.1 (-12.9) | 25.0 (-17.4) |
| Difference from counterfactual                    | 0.5 (-0.3)                  | 0.1 (-3.8)  | -0.8 (-8.1)  | -0.1 (-12.9) | -1.0 (-17.4) |
| Subsequent statin coupon                          |                             |             |              |              |              |
| Predicted level (SE)                              | 26.7 (-0.1)                 | 24.4 (-2.6) | 24.5 (-5.7)  | 24.9 (-8.8)  | 25.2 (-12.1) |
| Difference from counterfactual                    | -2.5 (-0.1)                 | 0.5 (-2.6)  | -0.3 (-5.7)  | -0.1 (-8.8)  | -0.4 (-12.1) |
| <b>Rosuvastatin (Average pill-days dispensed)</b> |                             |             |              |              |              |
| No coupons                                        |                             |             |              |              |              |
| Predicted level (SE)                              | 28.6 (0.0)                  | 23.5 (0.0)  | 24.3 (-0.1)  | 24.5 (-0.1)  | 25.2 (-0.1)  |
| Other coupon                                      |                             |             |              |              |              |
| Predicted level (SE)                              | 27.8 (-0.1)                 | 23.6 (-1.8) | 24.4 (-4.0)  | 24.6 (-6.3)  | 25.2 (-8.7)  |
| Difference from counterfactual                    | -0.8 (-0.1)                 | 0.2 (-1.8)  | 0.2 (-4.0)   | 0.2 (-6.3)   | 0.0 (-8.7)   |
| Initial statin coupon                             |                             |             |              |              |              |
| Predicted level (SE)                              | 24.4 (-0.3)                 | 22.7 (-5.2) | 24.0 (-12.0) | 24.8 (-19.1) | 24.7 (-25.8) |
| Difference from counterfactual                    | -4.2 (-0.3)                 | -0.8 (-5.2) | -0.3 (-12.0) | 0.3 (-19.1)  | -0.5 (-25.8) |
| Subsequent statin coupon                          |                             |             |              |              |              |
| Predicted level (SE)                              | 26.7 (-0.1)                 | 23.4 (-3.5) | 24.4 (-8.0)  | 24.7 (-12.5) | 24.8 (-17.0) |
| Difference from counterfactual                    | -1.8 (-0.1)                 | -0.1 (-3.5) | 0.1 (-8.0)   | 0.2 (-12.5)  | -0.4 (-17.0) |

\*Represents the difference in average predicted values between coupon users and their counterfactual non-coupon using counterparts within each group (initial, subsequent, non-statin)

Source: IMS Health Lifelink LRx Data, 2007-2013

**Appendix Table 2. Differences in expenditures stratified by type of statin.**

| Time following incident statin fill          | Time         |               |               |               |                |
|----------------------------------------------|--------------|---------------|---------------|---------------|----------------|
|                                              | 1 month      | 1 year        | 2 years       | 3 years       | 4 years        |
| <b>Average Atorvastatin Copayment, \$</b>    |              |               |               |               |                |
| No coupons                                   |              |               |               |               |                |
| Predicted level (SE)                         | 18.1 (-0.1)  | 14.8 (-0.1)   | 16.4 (-0.1)   | 15.3 (-0.2)   | 13.8 (-0.2)    |
| Other coupon                                 |              |               |               |               |                |
| Predicted level (SE)                         | 15.3 (-0.2)  | 12.7 (-4.2)   | 13.3 (-9.5)   | 12.4 (-13.6)  | 11.5 (-17.2)   |
| Difference from counterfactual*              | -2.7 (-0.2)  | -2.1 (-4.2)   | -3.0 (-9.5)   | -2.8 (-13.6)  | -2.3 (-17.2)   |
| Initial statin coupon                        |              |               |               |               |                |
| Predicted level (SE)                         | 19.8 (-2.6)  | 8.1 (-11.8)   | 7.3 (-23.2)   | 7.1 (-35.2)   | 3.4 (-23.2)    |
| Difference from counterfactual               | 2.8 (-2.6)   | -5.0 (-11.8)  | -8.0 (-23.2)  | -8.2 (-35.2)  | -11.3 (-23.2)  |
| Subsequent statin coupon                     |              |               |               |               |                |
| Predicted level (SE)                         | 13.4 (-0.3)  | 16.6 (-14.7)  | 18.9 (-36.5)  | 18.4 (-54.8)  | 14.6 (-59.0)   |
| Difference from counterfactual               | -6.4 (-0.3)  | 1.4 (-14.7)   | 2.2 (-36.5)   | 2.8 (-54.8)   | 0.5 (-59.0)    |
| <b>Average Atorvastatin Monthly Cost, \$</b> |              |               |               |               |                |
| No coupons                                   |              |               |               |               |                |
| Predicted level (SE)                         | 128.3 (-0.2) | 103.0 (-0.2)  | 110.4 (-0.3)  | 113.4 (-0.3)  | 118.0 (-0.5)   |
| Other coupon                                 |              |               |               |               |                |
| Predicted level (SE)                         | 127.9 (-0.5) | 104.7 (-8.7)  | 113.3 (-20.6) | 116.4 (-32.7) | 118.3 (-45.0)  |
| Difference from counterfactual               | -1.4 (-0.4)  | 1.3 (-8.7)    | 2.5 (-20.6)   | 2.5 (-32.7)   | -0.1 (-45.0)   |
| Initial statin coupon                        |              |               |               |               |                |
| Predicted level (SE)                         | 160.7 (-1.8) | 122.4 (-19.3) | 120.6 (-41.0) | 123.4 (-64.6) | 119.2 (-84.8)  |
| Difference from counterfactual               | 19.5 (-1.7)  | 6.1 (-19.4)   | -2.3 (-41.0)  | 1.2 (-64.6)   | -4.7 (-84.8)   |
| Subsequent statin coupon                     |              |               |               |               |                |
| Predicted level (SE)                         | 118.8 (-0.5) | 110.8 (-12.5) | 115.3 (-28.3) | 120.5 (-45.6) | 124.8 (-63.8)  |
| Difference from counterfactual               | -11.0 (-0.4) | 5.3 (-12.5)   | 2.1 (-28.3)   | 5.2 (-45.6)   | 4.9 (-63.8)    |
| <b>Average Rosuvastatin Copayment, \$</b>    |              |               |               |               |                |
| No coupons                                   |              |               |               |               |                |
| Predicted level (SE)                         | 21.4 (-0.1)  | 17.3 (-0.1)   | 17.7 (-0.2)   | 17.3 (-0.2)   | 17.5 (-0.3)    |
| Other coupon                                 |              |               |               |               |                |
| Predicted level (SE)                         | 16.9 (-0.2)  | 13.3 (-4.3)   | 13.3 (-9.2)   | 12.9 (-13.7)  | 12.9 (-18.7)   |
| Difference from counterfactual               | -4.3 (-0.2)  | -3.9 (-4.3)   | -4.2 (-9.2)   | -4.3 (-13.7)  | -4.3 (-18.7)   |
| Initial statin coupon                        |              |               |               |               |                |
| Predicted level (SE)                         | 15.3 (-2.3)  | 11.8 (-17.6)  | 12.6 (-41.1)  | 14.9 (-74.9)  | 15.5 (-105.7)  |
| Difference from counterfactual               | -6.8 (-2.3)  | -5.8 (-17.6)  | -5.4 (-41.1)  | -2.6 (-74.9)  | -2.2 (-105.7)  |
| Subsequent statin coupon                     |              |               |               |               |                |
| Predicted level (SE)                         | 12.0 (-0.5)  | 12.8 (-17.1)  | 11.4 (-33.3)  | 9.9 (-44.8)   | 9.2 (-55.9)    |
| Difference from counterfactual               | -9.8 (-0.5)  | -4.8 (-17.1)  | -6.4 (-33.3)  | -7.5 (-44.8)  | -8.4 (-55.9)   |
| <b>Average Rosuvastatin Monthly Cost, \$</b> |              |               |               |               |                |
| No coupons                                   |              |               |               |               |                |
| Predicted level (SE)                         | 128.6 (-0.2) | 106.9 (-0.2)  | 114.7 (-0.3)  | 119.5 (-0.3)  | 126.8 (-0.6)   |
| Other coupon                                 |              |               |               |               |                |
| Predicted level (SE)                         | 126.6 (-0.5) | 109.0 (-8.5)  | 116.5 (-20.0) | 120.7 (-31.9) | 126.4 (-45.3)  |
| Difference from counterfactual               | -3.4 (-0.4)  | 1.1 (-8.5)    | 0.9 (-20.0)   | 1.0 (-31.9)   | -0.3 (-45.3)   |
| Initial statin coupon                        |              |               |               |               |                |
| Predicted level (SE)                         | 106.6 (-1.4) | 101.9 (-21.6) | 113.9 (-52.4) | 121.9 (-86.4) | 124.9 (-120.1) |
| Difference from counterfactual               | -17.0 (-1.4) | -2.7 (-21.6)  | -2.1 (-52.4)  | 0.0 (-86.4)   | -4.1 (-120.1)  |
| Subsequent statin coupon                     |              |               |               |               |                |
| Predicted level (SE)                         | 117.0 (-0.6) | 107.3 (-17.2) | 116.1 (-40.7) | 122.5 (-66.3) | 125.8 (-92.2)  |
| Difference from counterfactual               | -8.2 (-0.6)  | 0.6 (-17.2)   | 0.7 (-40.7)   | 1.2 (-66.3)   | -1.6 (-92.2)   |

\*Represents the difference in average predicted values between coupon users and their counterfactual non-coupon using counterparts within each group (initial, subsequent, non-statin).

Source: IMS Health Lifelink LRx Data, 2007-2013

**Appendix Table 3. Average monthly statin utilization in alternative cohorts.**

| Time following incident statin fill                            | Time        |             |             |              |              |
|----------------------------------------------------------------|-------------|-------------|-------------|--------------|--------------|
|                                                                | 1 month     | 1 year      | 2 years     | 3 years      | 4 years      |
| <b>Open Cohort (Average pill-days dispensed)</b>               |             |             |             |              |              |
| No coupons                                                     |             |             |             |              |              |
| Predicted level (SE)                                           | 29.2 (0.0)  | 23.5 (0.0)  | 24.5 (0.0)  | 24.7 (0.0)   | 25.6 (0.0)   |
| Other coupon                                                   |             |             |             |              |              |
| Predicted level (SE)                                           | 28.6 (0.0)  | 23.6 (-0.8) | 24.9 (-1.7) | 25.5 (-2.8)  | 26.5 (-3.9)  |
| Difference from counterfactual                                 | -0.5 (0.0)  | 0.1 (-0.8)  | 0.4 (-1.7)  | 0.8 (-2.8)   | 0.9 (-3.9)   |
| Initial statin coupon                                          |             |             |             |              |              |
| Predicted level                                                |             |             |             |              |              |
| Standard error                                                 |             |             |             |              |              |
| Difference from counterfactual                                 | 28.2 (-0.2) | 24.1 (-2.0) | 24.0 (-4.3) | 24.5 (-6.8)  | 25.4 (-9.6)  |
| Standard error                                                 | -1.2 (-0.2) | 0.2 (-2.0)  | -0.6 (-4.3) | -0.2 (-6.8)  | -0.1 (-9.6)  |
| Subsequent statin coupon                                       |             |             |             |              |              |
| Predicted level (SE)                                           | 27.2 (-0.1) | 24.1 (-1.4) | 24.9 (-3.1) | 25.5 (-4.9)  | 26.4 (-6.9)  |
| Difference from counterfactual                                 | -1.8 (-0.1) | 0.5 (-1.4)  | 0.3 (-3.1)  | 0.7 (-4.9)   | 0.7 (-6.9)   |
| <b>No Mail-Order Cohort (Average pill-days dispensed)</b>      |             |             |             |              |              |
| No coupons                                                     |             |             |             |              |              |
| Predicted level (SE)                                           | 28.9 (0.0)  | 23.4 (0.0)  | 24.3 (0.0)  | 24.5 (0.0)   | 25.3 (0.0)   |
| Other coupon                                                   |             |             |             |              |              |
| Predicted level (SE)                                           | 28.0 (-0.1) | 23.3 (-0.9) | 24.4 (-2.1) | 24.8 (-3.2)  | 25.3 (-4.5)  |
| Difference from counterfactual                                 | -0.8 (0.0)  | 0.0 (-0.9)  | 0.1 (-2.1)  | 0.3 (-3.2)   | 0.1 (-4.5)   |
| Initial statin coupon                                          |             |             |             |              |              |
| Predicted level (SE)                                           | 27.6 (-0.2) | 23.8 (-2.3) | 23.6 (-5.0) | 23.9 (-7.9)  | 24.6 (-11.0) |
| Difference from counterfactual                                 | -1.6 (-0.2) | 0.1 (-2.3)  | -0.8 (-5.0) | -0.6 (-7.9)  | -0.7 (-11.0) |
| Subsequent statin coupon                                       |             |             |             |              |              |
| Predicted level (SE)                                           | 26.7 (-0.1) | 23.9 (-1.6) | 24.6 (-3.5) | 25.1 (-5.6)  | 25.6 (-7.7)  |
| Difference from counterfactual                                 | -2.2 (-0.1) | 0.4 (-1.6)  | 0.1 (-3.5)  | 0.4 (-5.6)   | 0.2 (-7.7)   |
| <b>Limited Opioid Use Cohort (Average pill-days dispensed)</b> |             |             |             |              |              |
| No coupons                                                     |             |             |             |              |              |
| Predicted level (SE)                                           | 29.9 (0.0)  | 24.1 (0.0)  | 24.3 (-0.1) | 24.3 (-0.1)  | 25.6 (-0.1)  |
| Other coupon                                                   |             |             |             |              |              |
| Predicted level (SE)                                           | 29.0 (-0.1) | 23.6 (-1.9) | 24.0 (-4.1) | 24.5 (-6.5)  | 25.8 (-9.2)  |
| Difference from counterfactual                                 | -1.1 (-0.1) | -0.5 (-1.9) | -0.2 (-4.1) | 0.2 (-6.4)   | 0.2 (-9.2)   |
| Initial statin coupon                                          |             |             |             |              |              |
| Predicted level (SE)                                           | 28.5 (-0.3) | 24.4 (-3.7) | 24.6 (-8.1) | 24.9 (-12.6) | 25.8 (-17.7) |
| Difference from counterfactual                                 | -1.9 (-0.3) | -0.2 (-3.7) | 0.1 (-8.1)  | 0.7 (-12.6)  | 0.3 (-17.7)  |
| Subsequent statin coupon                                       |             |             |             |              |              |
| Predicted level (SE)                                           | 26.6 (-0.1) | 24.6 (-3.1) | 24.7 (-6.8) | 25.0 (-10.6) | 25.4 (-14.6) |
| Difference from counterfactual                                 | -3.5 (-0.1) | 0.3 (-3.1)  | 0.2 (-6.8)  | 0.6 (-10.6)  | -0.3 (-14.6) |

\*Represents the difference in average predicted values between coupon users and their counterfactual non-coupon using counterparts within each group (initial, subsequent, non-statin).

Source: IMS Health Lifelink LRx Data, 2007-2013
